# Supplementary material
Source: publisher site journal article supplement (https://www.dovepress.com/article/365953)
Supplement: Supplementary file 1 [file get_supplementary_file.php]

| **Supplemental Table S1**: FAME Grant writing workshops (Total = 6) |
| --- |
| 1. Grant preparation; Type of grants; Transforming results into rationale for Grant; Learning the system |
| 2. Proposal - Specific Aims; Background and Significance; Rationale/Scientific Premise; Innovation |
| 3. Proposal - Preliminary data and Experimental approach |
| 4. Grant resubmission and rebuttal letter |
| 5. Write and discuss the actual proposal from FAME scholars and/or didactic sample |
| 6. Writing educational grants |
| **Supplemental Table S2**: FAME Career Development Lectures (Total = 7) |
| 1. Planning Clinician Scientist Career |
| 2. Promotion to Associate professor and Tenure - publications and research excellence |
| 3. Promotion to Associate Professor and Tenure - Educational/Teaching excellence |
| 4. Phase I trial |
| 5. IRB and clinical protocols |
| 6. Cutting-edge statistical approach in clinical trials |
| 7. Research Collaboration with Industry |
| **Supplemental Table S3**: Emerging technologies and trends in clinical research Lectures (Total = 12) |
| 1. Gene editing technology |
| 2. Drug Development/Pharmacokinetics |
| 3. Clinical trials networks; Digital Collaboration for Precision Health Research initiative |
| 4. Next Generation Sequencing |
| 5. Advances in cell and animal Imaging in research |
| 6. Stem Cells in Translational Research |
| 7. Machine Learning in Biomedical Research |
| 8. Epigenetics in Translational and Clinical Research |
| 9. Personalized Medicine |
| 10. Proteomics / Metabolomics |
| 11. Health Disparities/ Research opportunities to reduce health disparities |
| 12. Genetically engineered mice (GEM), Patient-derived xenografts (PDX) and animal models in research |

**Supplemental tables 1-3:** FAME curriculum organization and content. (1) FAME Grant writing workshops (Total = 6); (2) FAME Career Development Lectures (Total = 7); (3) Emerging technologies and trends in clinical research Lectures (Total = 12). FAME - clinician-scientist Faculty Mentoring Program

|  |
| --- |

**Supplemental Figure S1:** Figures showing scholars’ self-report of knowledge of intellectual and logistical resources at Penn State University (PSU). (A) knowledge of emerging technology - genome editing; (B) knowledge of drug development; (C) knowledge of industry collaboration. **** p<0.0001. FAME - clinician-scientist Faculty Mentoring Program

|  |
| --- |

**Supplemental figure S2:** Outcome data about scholarly activity by FAME scholars. (A) Number of research manuscripts submitted by FAME scholars before and after 2 years of FAME; (B) number of research manuscripts accepted for publication. FAME - clinician-scientist Faculty Mentoring Program

|  |
| --- |

**Supplemental figure S3:** Number of FAME scholars with new extramural grant funding with amount exceeding $50,000. FAME - clinician-scientist Faculty Mentoring Program
